# Supplementary material
Source: Springer Nature journal article supplement (https://www.springermedizin.de/resource/supplementary/12885_2012_3031_MOESM2_ESM.pdf/9463522)
Supplement: MOESM2 [file 9463522]

### All patients

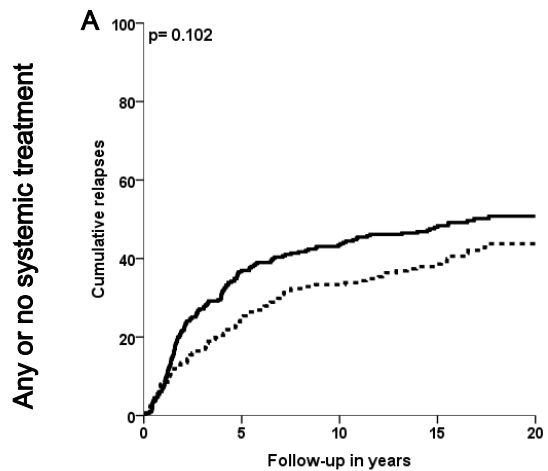

# at risk

|                 |     |     |     |     |    |
|-----------------|-----|-----|-----|-----|----|
| ALDH-1 negative | 201 | 148 | 111 | 66  | 24 |
| ALDH-1 positive | 295 | 222 | 153 | 106 | 23 |

### < 65 years

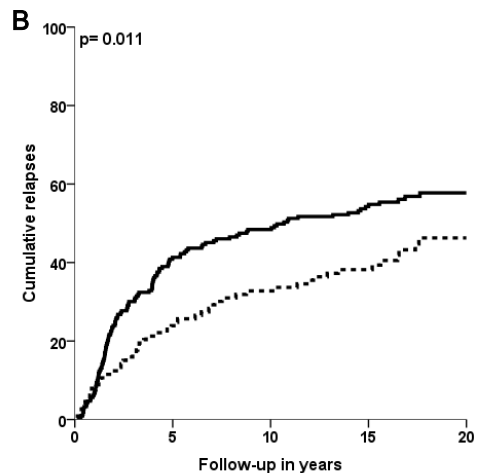

|                 |     |     |     |    |    |
|-----------------|-----|-----|-----|----|----|
| ALDH-1 negative | 113 | 94  | 83  | 56 | 22 |
| ALDH-1 positive | 213 | 164 | 119 | 86 | 21 |

### > 65 years

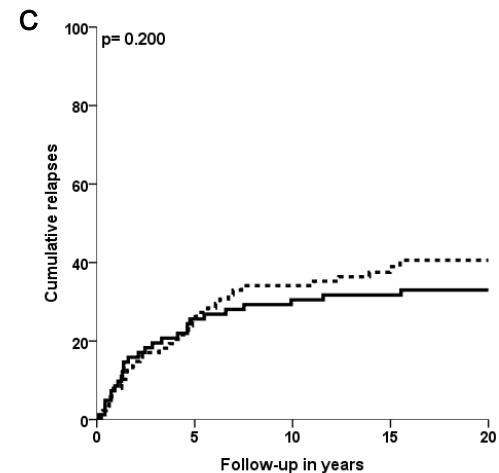

|                 |    |    |    |    |   |
|-----------------|----|----|----|----|---|
| ALDH-1 negative | 88 | 54 | 28 | 10 | 2 |
| ALDH-1 positive | 82 | 58 | 34 | 20 | 2 |

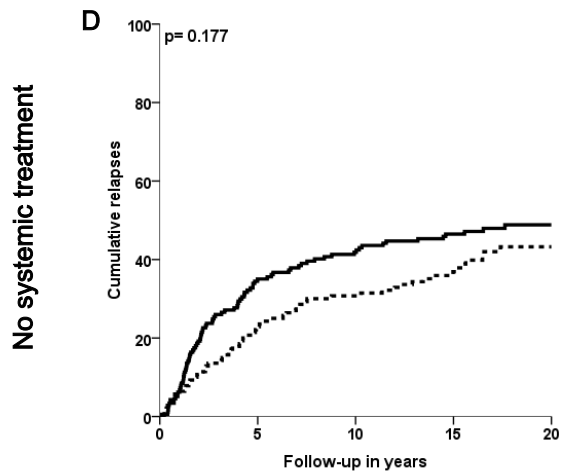

# at risk

|                 |     |     |    |    |    |
|-----------------|-----|-----|----|----|----|
| ALDH-1 negative | 140 | 107 | 81 | 48 | 20 |
| ALDH-1 positive | 177 | 141 | 88 | 61 | 16 |

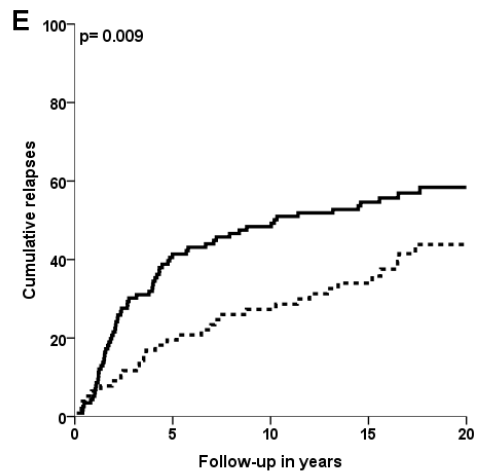

|                 |     |    |    |    |    |
|-----------------|-----|----|----|----|----|
| ALDH-1 negative | 77  | 67 | 60 | 42 | 18 |
| ALDH-1 positive | 116 | 97 | 63 | 45 | 14 |

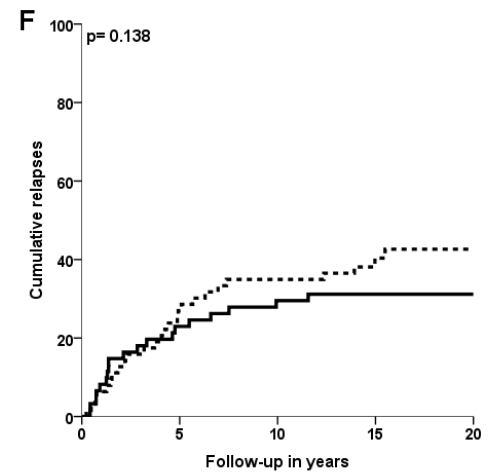

|                 |    |    |    |    |   |
|-----------------|----|----|----|----|---|
| ALDH-1 negative | 63 | 40 | 21 | 6  | 2 |
| ALDH-1 positive | 61 | 44 | 25 | 16 | 2 |
